# Supplementary material
Source: PubMed Central journal article supplement (PMC5034052)
Supplement: 10.1074_M116.740191_jbc.M116.740191-1.pdf [file 10.1074_M116.740191_jbc.M116.740191-1.pdf]

# Methanol Expression Regulator 1 (Mxr1p) is Essential for the Utilization of Amino Acids as the Sole Source of Carbon by the Methylophilic Yeast, *Pichia pastoris*

Umakant Sahu and Pundi N. Rangarajan

Department of Biochemistry, Indian Institute of Science, Bangalore 560012, INDIA.

## Supplemental data

**Identification of proteins bands a-f in Fig 1C by mass spectrometry.** Protein bands of interest were excised precisely from the Coomassie blue-stained SDS polyacrylamide gel and subjected to in-gel trypsin digestion using Trypsin profile IGD kit (SigmaAldrich). MALDI TOF was performed in HCT Ultra PTM Discovery System (ETD II- Bruker Daltonics) with 1100 series HPLC (Agilent). For identification of proteins, obtained 'peak list' was searched against NCBI non redundant database using MASCOT protein mass fingerprint software.

## Summary of MASCOT search results

### **1. Identification of protein (a) as *P. pastoris/Komagataella phaffii* Glutamate dehydrogenase 2:**

User : umakant  
Email : uksahucbt@gmail.com  
Database : NCBI nr 20160604 (88499796 sequences; 32486953934 residues)  
Taxonomy : Other Fungi (5444939 sequences)  
Timestamp : 14 Jun 2016 at 17:51:49 GMT  
Warning : Specifying a protein mass disables query intensity in PMF-search  
Warning : Specifying a protein mass disables mixture mode in PMF-search  
**Top Score : 66 for gi|254568192, NAD(+)-dependent glutamate dehydrogenase, degrades glutamate to ammonia and alpha-ketoglutarate [Komagataella phaffii GS115]**

|         |      |          |       |
|---------|------|----------|-------|
| 601.460 | 2261 | 2356.44  | 969   |
| 604.208 | 2773 | 4565.62  | 1718  |
| 606.185 | 2315 | 11315.25 | 4891  |
| 607.354 | 849  | 1757.87  | 1896  |
| 616.459 | 2536 | 1461.36  | 525   |
| 628.229 | 1900 | 3870.56  | 2046  |
| 629.435 | 1263 | 4643.34  | 3655  |
| 634.277 | 2421 | 4107.12  | 1702  |
| 642.319 | 2060 | 4085.05  | 1911  |
| 644.223 | 2133 | 23841.48 | 11476 |
| 650.247 | 2308 | 30583.63 | 13628 |
| 656.260 | 2490 | 13032.60 | 5327  |
| 666.229 | 2329 | 37379.88 | 17055 |
| 668.262 | 2032 | 3563.70  | 1910  |

|          |      |          |       |
|----------|------|----------|-------|
| 672.237  | 2482 | 18085.34 | 7811  |
| 682.215  | 2355 | 23647.89 | 10844 |
| 684.228  | 2346 | 2761.87  | 1284  |
| 685.577  | 2151 | 4351.71  | 2413  |
| 688.211  | 2308 | 9439.48  | 4847  |
| 704.193  | 2609 | 3374.32  | 1590  |
| 706.581  | 2001 | 2804.63  | 2100  |
| 707.624  | 2243 | 2162.89  | 923   |
| 708.541  | 2001 | 1901.68  | 1069  |
| 710.459  | 1764 | 1102.78  | 674   |
| 720.666  | 2119 | 3215.91  | 1744  |
| 722.646  | 2110 | 4483.87  | 3273  |
| 723.583  | 2285 | 1802.76  | 913   |
| 724.521  | 2277 | 1547.04  | 734   |
| 728.580  | 2238 | 1152.32  | 562   |
| 744.616  | 2275 | 3475.47  | 1865  |
| 760.647  | 2281 | 1662.85  | 915   |
| 766.628  | 2209 | 1695.01  | 973   |
| 781.656  | 3148 | 1034.79  | 535   |
| 782.613  | 2311 | 3386.97  | 1922  |
| 785.658  | 2357 | 691.15   | 444   |
| 813.657  | 2852 | 910.81   | 421   |
| 825.447  | 2205 | 1288.75  | 826   |
| 839.353  | 2342 | 935.67   | 595   |
| 841.355  | 2987 | 2015.29  | 1006  |
| 845.387  | 2595 | 2939.57  | 1672  |
| 855.326  | 2372 | 5688.60  | 3615  |
| 857.324  | 2713 | 1808.93  | 1097  |
| 861.364  | 2499 | 17164.97 | 10436 |
| 871.316  | 2433 | 6544.52  | 4382  |
| 877.351  | 2459 | 23005.18 | 14692 |
| 879.334  | 1292 | 1688.45  | 2422  |
| 893.329  | 2399 | 13444.76 | 9358  |
| 895.314  | 1638 | 1873.24  | 1988  |
| 899.307  | 2719 | 738.27   | 499   |
| 909.297  | 2367 | 4770.51  | 3368  |
| 911.399  | 1383 | 802.29   | 920   |
| 915.285  | 1472 | 512.33   | 613   |
| 936.749  | 1918 | 884.75   | 868   |
| 953.727  | 2328 | 446.82   | 358   |
| 958.735  | 2794 | 473.65   | 309   |
| 974.784  | 2552 | 744.18   | 506   |
| 975.789  | 2191 | 775.44   | 621   |
| 991.789  | 2656 | 774.59   | 567   |
| 1000.856 | 2134 | 895.09   | 819   |
| 1021.837 | 1935 | 789.92   | 921   |
| 1050.452 | 2350 | 645.02   | 610   |
| 1060.423 | 1966 | 1321.10  | 1403  |
| 1066.413 | 2251 | 2508.04  | 2484  |
| 1072.413 | 2596 | 836.11   | 621   |
| 1082.391 | 2439 | 2768.74  | 2531  |
| 1088.364 | 2732 | 1417.28  | 1234  |
| 1098.373 | 2895 | 1594.88  | 1233  |
| 1104.331 | 2065 | 899.72   | 1125  |
| 1214.067 | 2643 | 315.11   | 309   |
| 1223.030 | 2304 | 283.53   | 338   |
| 1230.994 | 2182 | 351.75   | 435   |
| 1236.092 | 2443 | 662.48   | 723   |
| 1252.058 | 2688 | 642.14   | 656   |
| 1277.441 | 2871 | 470.36   | 479   |

|          |      |         |      |
|----------|------|---------|------|
| 1289.052 | 2358 | 585.53  | 718  |
| 1293.438 | 3424 | 610.28  | 592  |
| 1304.010 | 3096 | 501.68  | 500  |
| 1309.414 | 2068 | 252.81  | 433  |
| 1318.992 | 2779 | 266.31  | 284  |
| 1379.107 | 1886 | 539.44  | 940  |
| 1401.017 | 1412 | 188.28  | 404  |
| 1416.989 | 2999 | 221.49  | 256  |
| 1504.369 | 2797 | 141.57  | 209  |
| 1564.268 | 2670 | 314.74  | 533  |
| 1586.266 | 3568 | 127.44  | 154  |
| 1588.234 | 3049 | 238.95  | 328  |
| 1610.264 | 2831 | 265.07  | 408  |
| 1623.201 | 2601 | 206.36  | 399  |
| 1626.233 | 2888 | 434.82  | 680  |
| 1656.357 | 3029 | 180.72  | 255  |
| 1671.898 | 989  | 73.39   | 327  |
| 1730.278 | 2390 | 119.78  | 256  |
| 1839.314 | 3105 | 136.39  | 269  |
| 1854.368 | 3453 | 94.91   | 160  |
| 1877.362 | 3514 | 268.60  | 455  |
| 1881.371 | 2841 | 1220.29 | 2578 |
| 1957.234 | 3514 | 187.75  | 330  |
| 2148.486 | 2879 | 67.24   | 167  |
| 2272.749 | 2706 | 81.32   | 296  |
| 2288.577 | 3037 | 116.85  | 346  |

### Concise Protein Summary Report

1. [gi|254568192](#) **Mass:** 117627 **Score:** 66 **Expect:** 1.5 **Matches:** 29  
NAD(+)-dependent glutamate dehydrogenase, degrades glutamate to ammonia and alpha-ketoglutarate [Komagataella phaffii GS115]

---

2. [gi|1027026648](#) **Mass:** 67285 **Score:** 66 **Expect:** 1.5 **Matches:** 19  
hypothetical protein Z520\_07198 [Fonsecaea multimorphosa CBS 102226]

---

3. [gi|808362097](#) **Mass:** 16409 **Score:** 50 **Expect:** 54 **Matches:** 10  
3-ketoacyl-CoA thiolase [Pseudozyma hubeiensis SY62]

---

4. [gi|648171492](#) **Mass:** 56234 **Score:** 50 **Expect:** 58 **Matches:** 17  
hypothetical protein GALMADRAFT\_52566 [Galerina marginata CBS 339.88]

---

5. [gi|1027188691](#) **Mass:** 101224 **Score:** 49 **Expect:** 73 **Matches:** 23  
hypothetical protein NEIG\_01641 [Nematocida sp. ERTm5]

---

### Search Parameters

**Type of search** : Peptide Mass Fingerprint  
**Enzyme** : Trypsin  
**Mass values** : Monoisotopic  
**Protein Mass** : 117 kDa  
**Peptide Mass Tolerance** :  $\pm 0.5$  Da

Peptide Charge State : 1+  
Max Missed Cleavages : 1  
Number of queries : 100

---

## **2. Identification of protein (b) as *P. pastoris/Komagataella phaffii* Alcohol oxidase 1:**

User : umakant  
Email : uksahucbt@gmail.com  
Database : NCBIInr 20160604 (88499796 sequences; 32486953934 residues)  
Taxonomy : Other Fungi (5444939 sequences)  
Timestamp : 14 Jun 2016 at 17:59:35 GMT  
Warning : Specifying a protein mass disables query intensity in PMF-search  
Warning : Specifying a protein mass disables mixture mode in PMF-search  
**Top Score : 88 for gj|254574324, Alcohol oxidase [Komagataella phaffii GS115]**

|         |      |          |       |
|---------|------|----------|-------|
| 604.209 | 2751 | 4277.18  | 1834  |
| 606.175 | 2466 | 17778.44 | 6871  |
| 614.274 | 1891 | 6370.72  | 3042  |
| 622.174 | 2620 | 3429.63  | 1300  |
| 628.204 | 2273 | 7051.06  | 3081  |
| 630.203 | 2309 | 13812.85 | 5915  |
| 632.194 | 2328 | 2255.20  | 910   |
| 634.319 | 1491 | 2861.12  | 1659  |
| 642.328 | 2104 | 4860.01  | 2173  |
| 644.225 | 2136 | 36535.97 | 17385 |
| 650.262 | 2052 | 21814.94 | 10603 |
| 656.294 | 2301 | 2672.39  | 1115  |
| 659.223 | 2382 | 2589.85  | 1111  |
| 660.255 | 2180 | 3111.39  | 1412  |
| 666.237 | 2128 | 25602.79 | 12776 |
| 668.271 | 2168 | 3563.78  | 1763  |
| 672.263 | 2232 | 4563.27  | 2068  |
| 682.219 | 2143 | 13478.24 | 6714  |
| 684.264 | 2263 | 1888.02  | 926   |
| 688.233 | 2262 | 2453.19  | 1133  |
| 704.215 | 2234 | 1038.58  | 540   |
| 706.218 | 2189 | 1029.35  | 556   |
| 801.650 | 2113 | 1109.58  | 897   |
| 804.552 | 1793 | 604.74   | 477   |
| 819.405 | 1832 | 3176.07  | 2563  |
| 825.407 | 2231 | 3297.03  | 2050  |
| 833.280 | 2805 | 1206.51  | 686   |
| 841.349 | 2280 | 6741.33  | 4471  |
| 845.431 | 2066 | 955.19   | 655   |
| 855.319 | 2454 | 11194.22 | 6965  |
| 857.312 | 2418 | 7103.70  | 4455  |
| 861.379 | 2275 | 7895.93  | 5142  |
| 871.304 | 2536 | 9269.09  | 5678  |
| 877.356 | 2252 | 10077.09 | 7002  |
| 879.328 | 1900 | 1493.34  | 1189  |
| 893.324 | 2288 | 5607.07  | 4045  |
| 895.269 | 2354 | 1918.46  | 1305  |
| 909.283 | 2302 | 1473.56  | 1084  |
| 925.731 | 2128 | 1965.47  | 1731  |

|          |      |          |       |
|----------|------|----------|-------|
| 939.751  | 2517 | 7603.43  | 5408  |
| 1010.813 | 2441 | 726.24   | 608   |
| 1030.393 | 2672 | 1095.77  | 899   |
| 1044.353 | 2106 | 514.81   | 513   |
| 1046.359 | 2664 | 1880.50  | 1455  |
| 1050.406 | 2438 | 723.41   | 595   |
| 1060.362 | 2692 | 3291.77  | 2518  |
| 1066.389 | 2631 | 3850.67  | 3113  |
| 1080.898 | 2731 | 598.93   | 454   |
| 1082.362 | 2470 | 3672.79  | 3125  |
| 1084.329 | 3247 | 809.16   | 491   |
| 1088.348 | 3510 | 977.59   | 594   |
| 1098.339 | 2804 | 1780.96  | 1352  |
| 1118.805 | 2262 | 437.29   | 469   |
| 1143.943 | 2493 | 344.29   | 393   |
| 1183.978 | 2680 | 5480.34  | 5141  |
| 1217.948 | 3831 | 563.04   | 417   |
| 1221.914 | 3172 | 621.59   | 514   |
| 1227.942 | 3160 | 588.93   | 488   |
| 1230.005 | 3140 | 944.49   | 858   |
| 1271.348 | 3583 | 594.64   | 460   |
| 1277.392 | 2926 | 792.84   | 842   |
| 1287.287 | 2794 | 284.42   | 379   |
| 1293.360 | 2579 | 912.40   | 1118  |
| 1309.305 | 3048 | 388.58   | 396   |
| 1315.132 | 3104 | 430.05   | 415   |
| 1353.972 | 2828 | 875.77   | 1032  |
| 1383.060 | 3483 | 351.70   | 347   |
| 1446.017 | 3310 | 4396.15  | 4692  |
| 1448.225 | 3049 | 10158.61 | 11807 |
| 1459.161 | 3457 | 1829.78  | 1942  |
| 1472.079 | 3239 | 1516.94  | 1707  |
| 1482.220 | 3334 | 534.08   | 615   |
| 1486.206 | 3986 | 293.44   | 282   |
| 1510.074 | 2714 | 244.63   | 344   |
| 1523.157 | 3516 | 477.59   | 495   |
| 1524.126 | 3420 | 993.94   | 1129  |
| 1582.221 | 3268 | 401.18   | 540   |
| 1596.239 | 2653 | 298.24   | 495   |
| 1602.115 | 3782 | 1448.35  | 1652  |
| 1644.188 | 3553 | 6390.64  | 8202  |
| 1676.100 | 4127 | 1174.01  | 1354  |
| 1682.211 | 3069 | 289.29   | 480   |
| 1711.148 | 4467 | 231.56   | 266   |
| 1750.208 | 3754 | 3731.35  | 4974  |
| 1795.147 | 3731 | 1212.83  | 1798  |
| 1885.443 | 3227 | 575.84   | 1096  |
| 1895.331 | 4810 | 239.74   | 368   |
| 1941.312 | 3015 | 117.34   | 218   |
| 1980.314 | 3851 | 1243.75  | 2071  |
| 2013.505 | 3589 | 198.49   | 349   |
| 2026.287 | 3853 | 894.95   | 1533  |
| 2170.353 | 4189 | 331.16   | 533   |
| 2319.535 | 3882 | 339.65   | 695   |
| 2412.476 | 4760 | 1292.35  | 2222  |
| 2515.501 | 4376 | 263.04   | 510   |
| 2603.607 | 2490 | 145.93   | 313   |
| 2671.581 | 4903 | 152.77   | 326   |
| 2698.783 | 4940 | 319.61   | 682   |
| 2749.589 | 5203 | 355.01   | 691   |

3672.074          6480          233.63          573

## Concise Protein Summary Report

1. [gi|254574324](#) Mass: 73851 Score: **88** Expect: 0.009 Matches: 19  
Alcohol oxidase [Komagataella phaffii GS115]  
[gi|37694459](#) Mass: 73865 Score: **88** Expect: 0.009 Matches: 19  
alcohol oxidase AOX1 [Ogataea pini]

---

2. [gi|2104963](#) Mass: 73878 Score: 62 Expect: 3.2 Matches: 16  
alcohol oxidase [Komagataella pastoris]  
[gi|254572894](#) Mass: 73905 Score: 62 Expect: 3.2 Matches: 16  
hypothetical protein [Komagataella phaffii GS115]

---

3. [gi|1027143329](#) Mass: 17053 Score: 56 Expect: 14 Matches: 9  
hypothetical protein CC84DRAFT\_866443 [Paraphaeosphaeria sporulosa]

---

4. [gi|302511255](#) Mass: 48315 Score: 56 Expect: 15 Matches: 17  
hypothetical protein ARB\_04461 [Arthroderma benhamiae CBS 112371]

---

5. [gi|158251748](#) Mass: 34114 Score: 53 Expect: 29 Matches: 14  
hypothetical protein [Pleurotus ostreatus]

---

## Search Parameters

Type of search : Peptide Mass Fingerprint

Enzyme : Trypsin

Mass values : Monoisotopic

Protein Mass : 70 kDa

Peptide Mass Tolerance :  $\pm 0.5$  Da

Peptide Charge State : 1+

Max Missed Cleavages : 1

Number of queries : 100

---

### **3. Identification of protein (c) as *P. pastoris*/Komagataella phaffii Formate dehydrogenase:**

User : umakant

Email : uksahucht@gmail.com

Database : NCBI nr 20160604 (88499796 sequences; 32486953934 residues)

Taxonomy : Other Fungi (5444939 sequences)

Timestamp : 14 Jun 2016 at 18:05:39 GMT

Warning : Specifying a protein mass disables query intensity in PMF-search

Warning : Specifying a protein mass disables mixture mode in PMF-search

**Top Score : 60 for gi|25452123, NAD(+)-dependent formate dehydrogenase, may protect cells from exogenous formate [Komagataella phaffii GS115]**

586.364          1918          1644.05          770

|          |      |          |      |
|----------|------|----------|------|
| 606.148  | 1734 | 3271.12  | 2050 |
| 634.456  | 1663 | 3160.73  | 1968 |
| 644.184  | 1721 | 3220.59  | 2043 |
| 666.120  | 1609 | 3007.87  | 2358 |
| 668.410  | 1611 | 1727.91  | 1241 |
| 682.119  | 2036 | 2614.57  | 1561 |
| 710.495  | 2174 | 14121.38 | 7747 |
| 728.500  | 1729 | 1492.78  | 1132 |
| 748.456  | 2254 | 2906.15  | 1667 |
| 767.502  | 2109 | 1693.44  | 1106 |
| 786.490  | 2043 | 1427.53  | 972  |
| 788.557  | 1854 | 2054.40  | 1674 |
| 804.516  | 1635 | 3963.79  | 3848 |
| 805.588  | 3193 | 2183.92  | 927  |
| 826.586  | 1848 | 2657.30  | 2132 |
| 828.692  | 1792 | 2568.69  | 2175 |
| 842.581  | 1588 | 2452.45  | 2509 |
| 859.696  | 2053 | 4547.18  | 3528 |
| 881.616  | 1986 | 866.62   | 444  |
| 893.191  | 2643 | 780.00   | 366  |
| 909.182  | 2923 | 434.22   | 177  |
| 938.594  | 2710 | 648.67   | 249  |
| 948.582  | 2222 | 661.81   | 292  |
| 976.633  | 2077 | 598.23   | 255  |
| 987.757  | 2288 | 9016.84  | 7714 |
| 1009.707 | 2382 | 767.49   | 352  |
| 1025.688 | 2295 | 1229.90  | 1136 |
| 1033.745 | 2772 | 707.06   | 339  |
| 1049.768 | 2608 | 735.29   | 311  |
| 1072.721 | 2293 | 843.95   | 474  |
| 1087.761 | 2463 | 649.46   | 341  |
| 1110.682 | 2581 | 945.47   | 489  |
| 1148.680 | 2583 | 930.29   | 436  |
| 1165.799 | 2779 | 640.01   | 295  |
| 1181.744 | 2865 | 616.41   | 310  |
| 1204.863 | 2566 | 9224.75  | 9533 |
| 1210.864 | 2378 | 2717.12  | 3159 |
| 1226.852 | 2930 | 909.46   | 417  |
| 1232.864 | 3489 | 431.59   | 225  |
| 1242.789 | 2642 | 2106.16  | 2238 |
| 1248.791 | 2862 | 794.36   | 389  |
| 1264.816 | 3301 | 476.78   | 228  |
| 1280.768 | 3410 | 492.53   | 198  |
| 1306.915 | 4174 | 326.22   | 140  |
| 1335.936 | 2101 | 983.07   | 1524 |
| 1370.949 | 2949 | 583.35   | 301  |
| 1401.136 | 2333 | 415.53   | 302  |
| 1408.913 | 3153 | 430.19   | 259  |
| 1423.118 | 1964 | 455.81   | 340  |
| 1450.998 | 3061 | 1161.24  | 688  |
| 1485.003 | 4073 | 500.70   | 239  |

|          |      |         |      |
|----------|------|---------|------|
| 1501.897 | 2676 | 901.15  | 1492 |
| 1518.880 | 2644 | 1069.90 | 1845 |
| 1540.977 | 2496 | 1795.08 | 2860 |
| 1556.933 | 2457 | 2134.12 | 4138 |
| 1578.937 | 3384 | 767.14  | 438  |
| 1639.561 | 3365 | 413.00  | 235  |
| 1679.092 | 2598 | 836.03  | 1610 |
| 1762.959 | 4627 | 369.91  | 174  |
| 1807.180 | 2830 | 979.74  | 1936 |
| 1880.140 | 4233 | 627.06  | 387  |
| 1947.293 | 4955 | 417.65  | 256  |
| 2235.274 | 4340 | 1064.77 | 722  |
| 2257.341 | 3284 | 607.46  | 1392 |
| 2273.299 | 3514 | 1110.37 | 2576 |
| 2316.306 | 3202 | 550.30  | 1446 |
| 2354.380 | 3196 | 700.04  | 1894 |
| 2539.353 | 5705 | 302.82  | 201  |
| 2705.875 | 4832 | 212.52  | 140  |
| 2733.547 | 4600 | 350.09  | 319  |

### Concise Protein Summary Report

1. [gi|254572123](#) Mass: 40285 Score: 60 Expect: 5.2 Matches: 18  
NAD(+)-dependent formate dehydrogenase, may protect cells from exogenous formate [Komagataella phaffii GS115]
2. [gi|1026948073](#) Mass: 71347 Score: 59 Expect: 4.9 Matches: 17  
hypothetical protein SPPG\_00158 [Spizellomyces punctatus DAOM BR117]
3. [gi|1032873058](#) Mass: 43421 Score: 59 Expect: 3.5 Matches: 21  
26S protease regulatory subunit 8 [Purpureocillium lilacinum]
4. [gi|591490653](#) Mass: 38793 Score: 59 Expect: 6.3 Matches: 20  
*succinyl-CoA synthetase beta subunit [Fusarium oxysporum f. sp. vasinfectum 25433]*
5. [gi|818155629](#) Mass: 53490 Score: 53 Expect: 29 Matches: 18  
26S protease regulatory subunit 8 [Trichoderma harzianum]

**Type of search : Peptide Mass Fingerprint**

**Enzyme : Trypsin**  
**Mass values : Monoisotopic**  
**Protein Mass : 40 kDa**  
**Peptide Mass Tolerance : ± 1.2 Da**  
**Peptide Charge State : 1+**  
**Max Missed Cleavages : 1**  
**Number of queries : 71**

---



#### 4. Identification of protein (d) as *P. pastoris*/*Komagataella phaffii* Aconitase 1:

User : umakant  
Email : uksahucbt@gmail.com  
Database : NCBIInr 20160604 (88499796 sequences; 32486953934 residues)  
Timestamp : 14 Jun 2016 at 18:31:49 GMT  
Warning : Specifying a protein mass disables query intensity in PMF-search  
Warning : Specifying a protein mass disables mixture mode in PMF-search  
**Top Score : 143 for gi|254564667, Aconitase, required for the tricarboxylic acid (TCA) cycle [Komagataella phaffii GS115]**

|          |      |         |      |
|----------|------|---------|------|
| 602.839  | 3041 | 68.98   | 24   |
| 624.804  | 3190 | 133.51  | 44   |
| 666.917  | 2804 | 439.89  | 161  |
| 692.933  | 3938 | 108.47  | 32   |
| 697.095  | 2497 | 173.24  | 75   |
| 709.664  | 3905 | 51.42   | 17   |
| 715.990  | 2377 | 315.26  | 151  |
| 835.161  | 2477 | 150.61  | 86   |
| 872.166  | 2977 | 334.94  | 181  |
| 881.153  | 2357 | 213.32  | 139  |
| 921.140  | 3184 | 264.71  | 141  |
| 923.196  | 2681 | 223.56  | 141  |
| 937.297  | 3659 | 54.09   | 25   |
| 972.232  | 4890 | 63.59   | 24   |
| 983.354  | 2655 | 59.95   | 40   |
| 1009.359 | 2304 | 317.22  | 262  |
| 1038.343 | 2872 | 407.78  | 294  |
| 1044.223 | 2825 | 66.29   | 51   |
| 1076.423 | 4038 | 78.60   | 41   |
| 1083.478 | 2947 | 436.25  | 321  |
| 1090.426 | 2913 | 144.65  | 118  |
| 1148.570 | 2580 | 968.85  | 898  |
| 1158.575 | 3076 | 91.27   | 74   |
| 1168.555 | 2667 | 107.52  | 112  |
| 1171.545 | 3586 | 144.17  | 99   |
| 1179.482 | 4262 | 92.19   | 50   |
| 1189.498 | 3103 | 695.27  | 579  |
| 1210.511 | 5031 | 73.29   | 41   |
| 1230.699 | 2434 | 76.90   | 79   |
| 1239.578 | 2952 | 349.93  | 319  |
| 1250.519 | 3176 | 99.61   | 91   |
| 1291.612 | 2993 | 306.03  | 309  |
| 1318.628 | 5316 | 92.56   | 55   |
| 1346.691 | 3017 | 390.60  | 433  |
| 1369.679 | 3275 | 605.28  | 603  |
| 1451.781 | 2844 | 1364.94 | 1721 |
| 1470.764 | 3430 | 701.24  | 806  |
| 1473.771 | 3693 | 134.58  | 136  |
| 1507.854 | 3868 | 91.93   | 105  |
| 1515.742 | 4496 | 97.79   | 105  |
| 1558.816 | 3524 | 1210.29 | 1421 |
| 1594.855 | 3491 | 2819.39 | 1408 |
| 1604.884 | 3149 | 88.23   | 134  |
| 1641.868 | 4511 | 160.36  | 183  |

|          |      |         |      |
|----------|------|---------|------|
| 1660.921 | 3251 | 1265.48 | 1835 |
| 1730.004 | 3535 | 1951.08 | 2924 |
| 1746.019 | 5394 | 160.45  | 154  |
| 1765.040 | 3659 | 785.97  | 1144 |
| 1775.055 | 3214 | 380.39  | 686  |
| 1779.988 | 4477 | 125.40  | 152  |
| 1792.062 | 3512 | 1321.03 | 2148 |
| 1809.961 | 3186 | 1993.09 | 3621 |
| 1905.066 | 3146 | 765.79  | 1576 |
| 1920.152 | 4490 | 141.27  | 187  |
| 1928.154 | 3847 | 117.32  | 178  |
| 1943.125 | 3233 | 1722.97 | 3462 |
| 1951.240 | 3945 | 93.52   | 144  |
| 1964.236 | 3426 | 2495.53 | 4901 |
| 2024.326 | 3540 | 1424.07 | 2644 |
| 2093.260 | 3740 | 96.70   | 178  |
| 2169.499 | 3421 | 1080.16 | 2375 |
| 2194.484 | 4309 | 76.09   | 163  |
| 2411.043 | 2753 | 54.67   | 198  |
| 2414.479 | 3070 | 200.46  | 662  |
| 2550.411 | 3042 | 35.98   | 101  |
| 2558.614 | 4117 | 126.52  | 328  |
| 2787.756 | 4217 | 151.76  | 305  |
| 2789.796 | 3984 | 753.64  | 1932 |
| 3106.218 | 2855 | 35.65   | 134  |
| 3142.065 | 4047 | 336.29  | 1197 |

### Concise Protein Summary Report

1. [gi|254564667](#) **Mass:** 84496 **Score:** 143 **Expect:** 4.4e-07 **Matches:** 33  
Aconitase, required for the tricarboxylic acid (TCA) cycle and also independently required for mitoc [Komagataella phaffii GS115]

---

2. [gi|953490580](#) **Mass:** 39589 **Score:** 72 **Expect:** 5 **Matches:** 17  
Protein phosphatase 1, regulatory subunit, and related proteins [Plasmopara halstedii]

---

3. [gi|1022630977](#) **Mass:** 161946 **Score:** 71 **Expect:** 7.5 **Matches:** 24  
hypothetical protein PV10\_04424 [Exophiala mesophila]

---

4. [gi|516126108](#) **Mass:** 15022 **Score:** 70 **Expect:** 8.1 **Matches:** 11  
hypothetical protein [Nocardiopsis baichengensis]

---

5. [gi|757183878](#) **Mass:** 59061 **Score:** 70 **Expect:** 8.6 **Matches:** 22  
hypothetical protein [Lachnospiraceae bacterium TWA4]

---

### Search Parameters

**Type of search** : Peptide Mass Fingerprint  
**Enzyme** : Trypsin  
**Mass values** : Monoisotopic  
**Protein Mass** : 75 kDa  
**Peptide Mass Tolerance** :  $\pm 1.2$  Da

Peptide Charge State : 1+  
Max Missed Cleavages : 1  
Number of queries : 70

---

### 5. Identification of protein (e) as *P. pastoris*/Komagataella phaffii Malate synthase 1:

User : umakant  
Email : uksahucbt@gmail.com  
Database : NCBIInr 20160604 (88499796 sequences; 32486953934 residues)  
Timestamp : 15 Jun 2016 at 05:13:27 GMT  
Warning : Specifying a protein mass disables query intensity in PMF-search  
Warning : Specifying a protein mass disables mixture mode in PMF-search  
**Top Score : 89 for gi|254572972, Malate synthase [Komagataella phaffii GS115]**

|          |      |         |      |
|----------|------|---------|------|
| 646.805  | 3334 | 135.36  | 43   |
| 655.616  | 2986 | 119.29  | 41   |
| 664.821  | 3449 | 150.55  | 45   |
| 687.832  | 3074 | 112.40  | 44   |
| 698.562  | 4241 | 103.52  | 28   |
| 699.628  | 3962 | 130.25  | 34   |
| 714.990  | 2455 | 214.90  | 93   |
| 725.919  | 4076 | 134.07  | 39   |
| 742.980  | 3324 | 102.11  | 37   |
| 751.053  | 2517 | 969.99  | 488  |
| 763.046  | 2581 | 1856.06 | 916  |
| 774.171  | 2245 | 251.15  | 159  |
| 775.161  | 2479 | 406.23  | 219  |
| 802.099  | 3180 | 87.71   | 38   |
| 805.025  | 4263 | 96.38   | 36   |
| 843.192  | 2972 | 229.48  | 114  |
| 850.165  | 2796 | 141.77  | 77   |
| 884.321  | 2067 | 2654.68 | 1960 |
| 891.231  | 2327 | 86.17   | 65   |
| 898.243  | 2748 | 327.30  | 197  |
| 902.461  | 2628 | 209.36  | 134  |
| 916.191  | 3099 | 110.79  | 59   |
| 920.318  | 2574 | 151.48  | 99   |
| 925.216  | 2300 | 245.26  | 221  |
| 926.297  | 2270 | 251.61  | 191  |
| 942.295  | 3657 | 179.62  | 86   |
| 949.344  | 2269 | 1519.40 | 1115 |
| 970.359  | 2419 | 428.75  | 330  |
| 994.383  | 4145 | 98.35   | 46   |
| 1004.529 | 2637 | 161.31  | 116  |
| 1013.359 | 2957 | 136.08  | 77   |
| 1021.532 | 1991 | 1073.96 | 1079 |
| 1042.365 | 2336 | 293.83  | 261  |
| 1044.568 | 2208 | 1707.63 | 1540 |
| 1048.420 | 2183 | 327.28  | 316  |
| 1054.467 | 2835 | 159.98  | 121  |
| 1099.470 | 2301 | 1234.94 | 1330 |
| 1101.488 | 2499 | 277.32  | 222  |
| 1112.519 | 2490 | 103.37  | 100  |

|          |      |         |      |
|----------|------|---------|------|
| 1126.600 | 2210 | 1195.53 | 1246 |
| 1136.541 | 2263 | 245.41  | 258  |
| 1148.564 | 3322 | 130.44  | 97   |
| 1155.575 | 3281 | 156.37  | 112  |
| 1160.545 | 2419 | 219.89  | 229  |
| 1163.675 | 2274 | 2649.82 | 2773 |
| 1189.553 | 3245 | 232.45  | 186  |
| 1191.582 | 2226 | 1622.30 | 1900 |
| 1200.640 | 2948 | 358.73  | 320  |
| 1203.587 | 2685 | 1222.12 | 1209 |
| 1207.776 | 2136 | 1709.82 | 2063 |
| 1266.625 | 3963 | 122.31  | 90   |
| 1284.817 | 2143 | 525.89  | 713  |
| 1300.384 | 838  | 88.86   | 299  |
| 1306.688 | 2557 | 897.82  | 1093 |
| 1347.735 | 2112 | 255.20  | 360  |
| 1381.620 | 2416 | 250.37  | 335  |
| 1415.824 | 2593 | 1978.70 | 2642 |
| 1435.824 | 2110 | 131.80  | 236  |
| 1454.861 | 3740 | 103.88  | 101  |
| 1471.811 | 3192 | 105.23  | 155  |
| 1484.851 | 3402 | 125.00  | 170  |
| 1511.891 | 3696 | 103.37  | 104  |
| 1514.866 | 3223 | 95.68   | 125  |
| 1528.928 | 2772 | 329.33  | 444  |
| 1549.991 | 3286 | 137.86  | 183  |
| 1635.910 | 2777 | 100.81  | 174  |
| 1660.993 | 2260 | 140.85  | 284  |
| 1708.067 | 2797 | 236.73  | 503  |
| 1725.096 | 2346 | 634.87  | 1614 |
| 1825.685 | 1382 | 121.85  | 728  |
| 1840.959 | 2157 | 96.07   | 251  |
| 1864.374 | 2221 | 88.22   | 248  |
| 1902.313 | 1614 | 94.14   | 367  |
| 1943.305 | 2951 | 1230.50 | 2796 |
| 1962.449 | 2059 | 179.59  | 600  |
| 2040.394 | 2943 | 201.72  | 540  |
| 2047.348 | 2801 | 617.15  | 1624 |
| 2061.608 | 5674 | 100.14  | 243  |
| 2084.700 | 1211 | 64.13   | 286  |
| 2134.756 | 2438 | 48.44   | 186  |
| 2141.397 | 5304 | 48.31   | 72   |
| 2472.644 | 3714 | 40.33   | 99   |
| 2568.712 | 3784 | 46.73   | 139  |
| 2700.847 | 4903 | 50.84   | 27   |
| 2770.977 | 3565 | 49.36   | 154  |

### Concise Protein Summary Report

- [gi|254572972](#) **Mass:** 65590 **Score:** 89 **Expect:** 0.1 **Matches:** 35  
 Malate synthase [Komagataella phaffii GS115]

[gi|328354576](#) **Mass:** 63064 **Score:** 88 **Expect:** 0.13 **Matches:** 35  
 malate synthase [Komagataella phaffii CBS 7435]

---

- [gi|392716072](#) **Mass:** 28022 **Score:** 70 **Expect:** 9.9 **Matches:** 21  
 GntR family transcriptional regulator [Ralstonia sp. PBA]

---

3. [gi|729795642](#) Mass: 6397 Score: 68 Expect: 15 Matches: 8  
hypothetical protein PU73\_23670 [Escherichia coli]

---

4. [gi|922997944](#) Mass: 28127 Score: 67 Expect: 17 Matches: 17  
enoyl-CoA hydratase [Bacillus koreensis]

---

5. [gi|516078742](#) Mass: 19173 Score: 67 Expect: 17 Matches: 14  
hypothetical protein [beta proteobacterium L13]

---

### Search Parameters

Type of search : Peptide Mass Fingerprint  
 Enzyme : Trypsin  
 Mass values : Monoisotopic  
 Protein Mass : 65 kDa  
 Peptide Mass Tolerance :  $\pm 1.2$  Da  
 Peptide Charge State : 1+  
 Max Missed Cleavages : 1  
 Number of queries : 85

### 6. Identification of protein (f) as *P. pastoris/Komagataella phaffii* citrate synthase 1

User : umakant  
 Email : uksahucbt@gmail.com  
 Database : NCBI nr 20160604 (88499796 sequences; 32486953934 residues)  
 Taxonomy : Other Fungi (5444939 sequences)  
 Timestamp : 14 Jun 2016 at 18:12:56 GMT  
**Top Score : 64 for gi|254565307, hypothetical protein [Komagataella phaffii GS115]\***

|         |      |      |      |         |      |
|---------|------|------|------|---------|------|
| 600.428 | 11.8 | 153  | 1951 | 799.13  | 354  |
| 602.463 | 16.9 | 137  | 2094 | 1140.49 | 500  |
| 605.490 | 12.7 | 236  | 2182 | 857.20  | 349  |
| 607.508 | 62.0 | 2816 | 2385 | 4187.95 | 1665 |
| 610.428 | 12.2 | 200  | 1941 | 820.32  | 342  |
| 612.411 | 15.1 | 235  | 2181 | 1017.73 | 464  |
| 626.445 | 10.4 | 142  | 3511 | 688.78  | 218  |
| 634.470 | 19.3 | 428  | 1964 | 1228.26 | 548  |
| 647.534 | 23.3 | 1154 | 2486 | 1379.28 | 559  |
| 649.507 | 11.7 | 279  | 2040 | 684.60  | 317  |
| 651.452 | 8.7  | 109  | 2490 | 503.81  | 204  |
| 669.301 | 12.6 | 498  | 900  | 647.27  | 650  |
| 684.514 | 28.6 | 2503 | 1465 | 1373.21 | 1015 |
| 689.523 | 9.5  | 74   | 4814 | 450.60  | 127  |
| 703.503 | 12.5 | 220  | 2222 | 550.65  | 279  |
| 705.524 | 13.0 | 351  | 2938 | 565.11  | 210  |
| 707.489 | 7.5  | 97   | 4574 | 322.42  | 80   |
| 719.535 | 6.9  | 80   | 3559 | 280.70  | 93   |
| 756.622 | 9.0  | 92   | 3736 | 284.71  | 89   |
| 804.600 | 11.4 | 262  | 3445 | 287.89  | 116  |

|          |       |        |      |          |       |
|----------|-------|--------|------|----------|-------|
| 846.721  | 7.1   | 67     | 3070 | 159.27   | 79    |
| 848.653  | 10.0  | 251    | 3001 | 225.08   | 105   |
| 875.584  | 6.9   | 81     | 3118 | 142.39   | 81    |
| 917.671  | 7.7   | 82     | 5341 | 134.77   | 37    |
| 984.672  | 7.3   | 140    | 4232 | 124.26   | 57    |
| 993.726  | 11.1  | 212    | 3902 | 191.28   | 91    |
| 1003.726 | 14.1  | 416    | 2754 | 244.67   | 174   |
| 1010.732 | 61.9  | 19025  | 2541 | 1062.65  | 835   |
| 1023.789 | 25.6  | 2035   | 2814 | 432.33   | 294   |
| 1033.817 | 16.2  | 884    | 1860 | 270.20   | 279   |
| 1042.774 | 27.0  | 3199   | 3242 | 444.48   | 277   |
| 1071.754 | 69.4  | 17974  | 2829 | 1112.95  | 846   |
| 1097.776 | 7.7   | 222    | 4159 | 123.15   | 65    |
| 1131.769 | 36.1  | 3671   | 2806 | 559.08   | 451   |
| 1146.842 | 19.0  | 1344   | 3218 | 286.84   | 205   |
| 1150.868 | 6.8   | 166    | 5347 | 102.93   | 47    |
| 1161.889 | 17.9  | 1289   | 3599 | 262.49   | 181   |
| 1194.854 | 8.9   | 79     | 4793 | 122.47   | 74    |
| 1203.840 | 8.1   | 139    | 3472 | 110.85   | 88    |
| 1211.741 | 9.8   | 262    | 1688 | 131.86   | 185   |
| 1218.846 | 48.6  | 5520   | 2773 | 644.61   | 608   |
| 1226.924 | 10.5  | 353    | 3320 | 137.36   | 116   |
| 1260.920 | 10.5  | 513    | 3520 | 132.69   | 113   |
| 1274.983 | 20.2  | 1127   | 3471 | 259.88   | 212   |
| 1308.039 | 256.5 | 120568 | 2894 | 3453.02  | 3547  |
| 1331.923 | 6.6   | 68     | 3787 | 89.60    | 74    |
| 1364.942 | 45.4  | 3184   | 3158 | 582.03   | 574   |
| 1377.904 | 10.6  | 74     | 4964 | 132.85   | 105   |
| 1379.004 | 18.0  | 359    | 2370 | 225.08   | 320   |
| 1395.947 | 7.9   | 115    | 6046 | 97.62    | 57    |
| 1400.925 | 10.8  | 81     | 3245 | 133.05   | 159   |
| 1421.777 | 9.2   | 99     | 2078 | 114.07   | 183   |
| 1422.922 | 9.6   | 75     | 3008 | 119.27   | 142   |
| 1434.922 | 7.2   | 85     | 5794 | 90.22    | 68    |
| 1462.899 | 9.1   | 523    | 2477 | 116.27   | 208   |
| 1490.952 | 16.4  | 1942   | 4023 | 215.04   | 196   |
| 1534.905 | 13.8  | 304    | 2657 | 187.60   | 275   |
| 1558.054 | 9.8   | 259    | 5370 | 129.44   | 151   |
| 1570.037 | 7.8   | 167    | 3721 | 101.52   | 106   |
| 1618.007 | 11.8  | 215    | 3889 | 143.95   | 210   |
| 1619.974 | 10.3  | 104    | 3331 | 125.13   | 207   |
| 1631.042 | 11.1  | 219    | 3197 | 135.02   | 178   |
| 1654.035 | 13.0  | 561    | 3466 | 158.93   | 218   |
| 1690.044 | 7.9   | 120    | 4347 | 99.20    | 97    |
| 1697.683 | 19.2  | 275    | 1093 | 202.29   | 1087  |
| 1706.015 | 16.3  | 122    | 4187 | 230.09   | 300   |
| 1736.168 | 292.1 | 46692  | 3776 | 5036.90  | 6751  |
| 1740.187 | 639.7 | 357581 | 3591 | 11311.90 | 15769 |
| 1752.112 | 15.6  | 2013   | 4415 | 294.76   | 346   |
| 1791.170 | 54.4  | 51645  | 3946 | 984.52   | 1340  |
| 1817.130 | 17.3  | 261    | 4201 | 267.98   | 370   |
| 1836.219 | 13.8  | 267    | 698  | 185.91   | 319   |
| 1844.191 | 15.5  | 1571   | 3900 | 198.02   | 304   |
| 1884.051 | 6.5   | 107    | 1427 | 70.03    | 187   |
| 1887.256 | 7.5   | 242    | 5857 | 83.57    | 84    |
| 1911.206 | 20.2  | 1151   | 3709 | 208.99   | 350   |
| 1928.171 | 6.1   | 85     | 4579 | 60.15    | 62    |
| 1945.257 | 17.6  | 473    | 3493 | 146.22   | 326   |
| 1948.051 | 9.3   | 157    | 3939 | 87.35    | 132   |
| 1954.111 | 6.5   | 208    | 2576 | 59.43    | 147   |

|          |      |      |      |        |     |
|----------|------|------|------|--------|-----|
| 2009.067 | 8.2  | 163  | 3086 | 57.89  | 144 |
| 2045.213 | 6.7  | 107  | 4342 | 50.53  | 90  |
| 2050.224 | 6.1  | 81   | 4495 | 50.01  | 76  |
| 2057.340 | 10.2 | 104  | 4700 | 83.54  | 128 |
| 2062.317 | 18.0 | 425  | 4106 | 133.11 | 276 |
| 2066.234 | 14.7 | 597  | 3807 | 119.77 | 205 |
| 2110.286 | 11.3 | 478  | 4684 | 89.31  | 131 |
| 2124.246 | 7.4  | 258  | 3964 | 55.94  | 93  |
| 2167.272 | 14.1 | 349  | 5096 | 94.93  | 129 |
| 2178.411 | 23.9 | 2294 | 3950 | 151.98 | 285 |
| 2193.406 | 6.1  | 78   | 5227 | 38.23  | 52  |
| 2270.255 | 33.6 | 1373 | 4247 | 177.12 | 364 |
| 2533.468 | 16.4 | 563  | 5030 | 71.72  | 130 |
| 2550.493 | 20.4 | 512  | 6164 | 89.77  | 158 |
| 2581.485 | 13.7 | 395  | 5273 | 54.22  | 115 |
| 2879.146 | 8.7  | 83   | 4510 | 24.21  | 55  |
| 2931.849 | 13.0 | 78   | 5870 | 35.46  | 68  |
| 3033.846 | 7.3  | 76   | 941  | 16.13  | 59  |
| 3089.050 | 11.5 | 87   | 8037 | 26.86  | 43  |
| 3158.726 | 11.2 | 160  | 4220 | 25.28  | 56  |

### Concise Protein Summary Report

1. [gi|254565307](#) **Mass:** 51873 **Score:** 64 **Expect:** 2 **Matches:** 12  
hypothetical protein [Komagataella phaffii GS115]

---

2. [gi|1032903699](#) **Mass:** 100174 **Score:** 54 **Expect:** 20 **Matches:** 17  
hypothetical protein LLEC1\_00845 [Cordyceps confragosa]  
[gi|549048304](#) **Mass:** 9227 **Score:** 41 **Expect:** 4.7e+02 **Matches:** 3  
Protein of unknown function [Pyronema omphalodes CBS 100304]

---

3. [gi|1023260822](#) **Mass:** 61173 **Score:** 50 **Expect:** 51 **Matches:** 11  
hypothetical protein CALCODRAFT\_330062 [Calocera cornea HHB12733]

---

4. [gi|700491037](#) **Mass:** 49069 **Score:** 49 **Expect:** 72 **Matches:** 9  
O-methyltransferase, family 3 [Penicillium italicum]

---

5. [gi|953101707](#) **Mass:** 14422 **Score:** 48 **Expect:** 77 **Matches:** 5  
hypothetical protein CNM01675 [Cryptococcus neoformans var. neoformans JEC21]

#### Search Parameters

**Type of search** : Peptide Mass Fingerprint  
**Enzyme** : Trypsin  
**Mass values** : Monoisotopic  
**Protein Mass** : Unrestricted  
**Peptide Mass Tolerance** :  $\pm 0.5$  Da  
**Peptide Charge State** : 1+  
**Max Missed Cleavages** : 1  
**Number of queries** : 100  
**Selected for scoring** : 20

**\* This hypothetical protein has 76% amino acid identity with *Saccharomyces cerevisiae* citrate synthase 1.**
